# Supplementary material
Source: PubMed Central journal article supplement (PMC8792367)
Supplement: NIHMS1767422-supplement-1.pdf [file NIHMS1767422-supplement-1.pdf]

625 **Supplemental Table 1:** List of 112 predictors included in data exploration

626

| <b>Demographics</b> |             |                                                                                   | <b>Type of variable</b> |
|---------------------|-------------|-----------------------------------------------------------------------------------|-------------------------|
|                     | p01bmi      | BMI                                                                               | Continuous              |
|                     | v00age      | age                                                                               | Continuous              |
|                     | p02sex_01   | sex                                                                               | Categorical             |
|                     | p02race     | Race                                                                              | Categorical             |
|                     | p02hispanic | Hispanic                                                                          | Continuous              |
|                     | v00abcirc   | EV: Abdominal circumference (cm)                                                  | Continuous              |
|                     | v00bpsys    | EV:Q6.Blood pressure: systolic (mm Hg)                                            | Continuous              |
|                     | v00bpdias   | EV:Q6.Blood pressure: diastolic (mm Hg)                                           | Continuous              |
|                     | v00rpavg    | EV: Radial pulse: average beats per minute                                        | Continuous              |
| <b>History</b>      |             |                                                                                   |                         |
|                     | p02famhkr   | IEI:Q15.Mother, father, sister, or brother (blood relative) had knee repl surgery | Categorical             |
|                     | p01famhr    | SV:Q12.Mother, father, sister, or brother (blood relative) had hip replacement    | Categorical             |
|                     | p01famkr    | SV:Q13.Mother, father, sister, or brother (blood relative) had knee replacement   | Categorical             |
|                     | p01brohrcv  | SV:Q12d.Brother had hip replacement surgery                                       | Categorical             |
|                     | p01momkrcv  | SV:Q13a.Mother had knee replacement surgery                                       | Categorical             |
|                     | p01dadkrcv  | SV:Q13b.Father had knee replacement surgery                                       | Categorical             |
|                     | p01siskrcv  | SV:Q13c.Sister had knee replacement surgery                                       | Categorical             |

|             |             |                                                                                  |             |
|-------------|-------------|----------------------------------------------------------------------------------|-------------|
|             | p01brokrvcv | SV:Q13d.Brother had knee replacement surgery                                     | Categorical |
|             | p01injr     | SV:Q24.Right knee, ever injured badly enough to limit ability to walk            | Categorical |
|             | p01ksurgr   | SV:Q25.Right knee, ever have surgery or arthroscopy                              | Categorical |
|             | p01hrs      | SV:Q40.Ever had hip replacement surgery where all or part of joint was replaced  | Categorical |
|             | v00diab     | SAQ:Q24.Charlson Comorbidity: have diabetes (high blood sugar)                   | Categorical |
|             | v00fall     | SAQ:Q32.Fallen and landed on floor or ground, past 12 months                     | Categorical |
|             | p02kinj     | Either knee, ever injured so badly difficult to walk for at least one week       | Categorical |
| <b>Pain</b> |             |                                                                                  |             |
|             | v00womkpr   | EV: Right knee: WOMAC Pain Score                                                 | Continuous  |
|             | p01kprn12   | SV:Q15.Right knee pain, aching or stiffness: any, past 12 months                 | Categorical |
|             | p01kpr12cv  | SV:Q15a.Right knee pain, aching or stiffness: more than half the days of a month | Categorical |
|             | v00wprkn1   | EV: Right knee pain: walking, last 7 days                                        | Categorical |
|             | v00wprkn2   | EV: Right knee pain: stairs, last 7 days                                         | Categorical |
|             | v00wprkn3   | EV: Right knee pain: in bed, last 7 days                                         | Categorical |
|             | v00wprkn4   | EV: Right knee pain: sit or lie down, last 7 days                                | Categorical |
|             | v00wprkn5   | EV: Right knee pain: standing, last 7 days                                       | Categorical |
|             | v00kprkn1   | EV:Q2a.Right knee pain: twisting/pivoting on knee, last 7 days                   | Categorical |
|             | v00kprkn2   | EV:Q2b.Right knee pain: straightening knee fully, last 7 days                    | Categorical |
|             | v00kprkn3   | EV:Q2c.Right knee pain: bending knee fully, last 7 days                          | Categorical |

|            |                                                                                     |             |
|------------|-------------------------------------------------------------------------------------|-------------|
| v00p7rkfr  | EV:Q3.Right knee pain: how often                                                    | Continuous  |
| v00ksxrkn1 | EV:Q6.Right knee symptoms: swelling, last 7 days                                    | Categorical |
| v00ksxrkn2 | EV:Q7.Right knee symptoms: feel grinding, hear clicking                             | Categorical |
| v00ksxrkn4 | EV:Q9.Right knee symptoms: straighten knee fully, last 7 days                       | Categorical |
| v00ksxrkn5 | EV:Q10.Right knee symptoms: bend knee fully, last 7 days                            | Categorical |
| p02kpnrcv  | IEI:Q9a.Right knee pain, aching or stiffness: more than half the days of a month    | Categorical |
| p01kpr30cv | SV:Q16a.Right knee pain, aching or stiffness: more than half the days, past 30 days | Categorical |
| v00womtsr  | EV: Right knee: WOMAC Total Score                                                   | Continuous  |
| p01rksx    | SV: Right knee baseline symptom status (combines past 30 days and 12 months)        | Categorical |
| p01rsxkoa  | SV: Right knee baseline symptomatic OA status                                       | Categorical |
| p01ksx     | SV: Frequent knee pain status by person                                             | Categorical |
| p01bl12sxr | SV: Right knee baseline frequent knee pain status                                   | Categorical |
| p01rkp30cv | SV:Q16.Right knee pain, aching or stiffness: any, past 30 days                      | Categorical |
| v00p7rkrcv | EV:Q3a.Right knee pain: severity, past 7 days, rated on scale of 0-10               | Categorical |
| p01pmrkrcv | SV:Q16b.Right knee pain: severity, past 30 days, rated on scale of 0-10             | Categorical |
| p01bp30    | SV:Q43.Any back pain, past 30 days                                                  | Categorical |
| v00kooskpr | EV: Right knee: KOOS Pain Score                                                     | Continuous  |
| v00womstfr | EV: Right knee: WOMAC Stiffness Score                                               | Continuous  |
| v00koosymr | EV: Right knee: KOOS Symptoms Score                                                 | Continuous  |

|                      |                              |                                                                                            |             |
|----------------------|------------------------------|--------------------------------------------------------------------------------------------|-------------|
|                      | v00womadlr                   | EV: Right knee: WOMAC Disability Score                                                     | Continuous  |
|                      | p01kpnrev                    | SV:Q14.Right knee pain, aching or stiffness: ever had more than half the days of the month | Categorical |
| <b>Muscle</b>        |                              |                                                                                            |             |
|                      | v00remaxf                    | Right Extension MAX Force                                                                  | Continuous  |
|                      | v00rfmaxf                    | Right Flexion MAX Force                                                                    | Continuous  |
|                      | v00rlwgt                     | EV:Q5.Isometric strength: right leg weight                                                 | Continuous  |
|                      | v00rftlpl                    | Right Flexion MAX Force Low Production Limit                                               | Continuous  |
|                      | v00rfthpl                    | Right Flexion MAX Force High Production Limit                                              | Continuous  |
|                      | v00rftlrl                    | Right Flexion MAX Force Low Relaxation Limit                                               | Continuous  |
|                      | v00rfthrl                    | Right Flexion MAX Force High Relaxation Limit                                              | Continuous  |
|                      | v00retlpl                    | Right Extension MAX Force Low Production Limit                                             | Continuous  |
|                      | v00rethpl                    | Right Extension MAX Force High Production Limit                                            | Continuous  |
|                      | v00retlrl                    | Right Extension MAX Force Low Relaxation Limit                                             | Continuous  |
|                      | v00rethrl                    | Right Extension MAX Force High Relaxation Limit                                            | Continuous  |
| <b>T<sub>2</sub></b> |                              |                                                                                            |             |
|                      | Average T <sub>2</sub>       |                                                                                            | Continuous  |
|                      | Lateral Femur T <sub>2</sub> |                                                                                            | Continuous  |
|                      | Lateral Tibia T <sub>2</sub> |                                                                                            | Continuous  |
|                      | Medial Femur T <sub>2</sub>  |                                                                                            | Continuous  |
|                      | Medial Tibia T <sub>2</sub>  |                                                                                            | Continuous  |

|              |                             |  |            |
|--------------|-----------------------------|--|------------|
|              | Patella T <sub>2</sub>      |  | Continuous |
| <b>WORMS</b> |                             |  | Ordinal    |
|              | Cartilage: Patella          |  | Ordinal    |
|              | Cartilage: Trochlea         |  | Ordinal    |
|              | Cartilage: Medial Femur     |  | Ordinal    |
|              | Cartilage: Lateral Femur    |  | Ordinal    |
|              | Cartilage: Medial Tibia     |  | Ordinal    |
|              | Cartilage: Lateral Tibia    |  | Ordinal    |
|              | Meniscus: Medial Anterior   |  | Ordinal    |
|              | Meniscus: Medial Body       |  | Ordinal    |
|              | Meniscus: Medial Posterior  |  | Ordinal    |
|              | Meniscus: Lateral Anterior  |  | Ordinal    |
|              | Meniscus: Lateral Body      |  | Ordinal    |
|              | Meniscus: Lateral Posterior |  | Ordinal    |
|              | Bone Marrow: Patella        |  | Ordinal    |
|              | Bone Marrow: Trochlea       |  | Ordinal    |
|              | Bone Marrow: Medial Femur   |  | Ordinal    |
|              | Bone Marrow: Lateral Femur  |  | Ordinal    |
|              | Bone Marrow: Medial Tibia   |  | Ordinal    |
|              | Bone Marrow: Lateral Tibia  |  | Ordinal    |

|                          |                       |                                                                                  |             |
|--------------------------|-----------------------|----------------------------------------------------------------------------------|-------------|
|                          | Meniscus Max Score    |                                                                                  | Ordinal     |
|                          | Cartilage Max Score   |                                                                                  | Ordinal     |
|                          | Bone Marrow Max Score |                                                                                  | Ordinal     |
|                          | Joint Effusion        |                                                                                  | Ordinal     |
| <b>Physical Activity</b> |                       |                                                                                  |             |
|                          | v00cstime1            | EV: Repeated chair stands: trial 1 time (sec.hundredths/sec)                     | Continuous  |
|                          | v00cstime2            | EV: Repeated chair stands: trial 2 time (sec.hundredths/sec)                     | Continuous  |
|                          | v00timet1             | EV:Q1.20-meter walk: trial 1 time to complete (sec.hundredths/sec)               | Continuous  |
| <b>Clinical Exam</b>     |                       |                                                                                  |             |
|                          | v00rkpatpn            | EV: Right knee exam: patellar quadriceps tendinitis, pain/tenderness             | Categorical |
|                          | v00rkeffb             | EV: Right knee exam: effusion, bulge sign positive                               | Categorical |
|                          | v00rkeffpt            | EV: Right knee exam: effusion, patellar tap positive                             | Categorical |
|                          | v00rkrfxpn            | EV: Right knee exam: knee flexion pain/tenderness present on exam                | Categorical |
|                          | v00rklttptn           | EV: Right knee exam: lateral tibiofemoral pain/tenderness present on exam        | Categorical |
|                          | v00rkmttptn           | EV: Right knee exam: medial tibiofemoral pain/tenderness present on exam         | Categorical |
|                          | v00rkabpn             | EV: Right knee exam: anserine bursa, pain/tenderness present on exam             | Categorical |
|                          | v00rkpfcrc            | EV: Right knee exam: patello-femoral crepitus present on exam                    | Categorical |
|                          | v00rkpgdptn           | EV: Right knee exam: patellar grind, painful or tender behind knee cap           | Categorical |
| <b>Medication</b>        |                       |                                                                                  |             |
|                          | v00nsaids             | EV:Q50b.Used nonprescription NSAIDS (e.g., Aspirin, Ibuprofen...) for joint pain | Categorical |

|                  |            |                                                                                  |             |
|------------------|------------|----------------------------------------------------------------------------------|-------------|
|                  | v00nsaidrx | EV:Q50c.Used prescription NSAIDS (e.g., Ibuprofen, Diclofenac...) for joint pain | Categorical |
|                  | v00coxibs  | EV:Q50d.Used COXIBS (e.g., Bextra, Celebrex...) for joint pain or arthritis      | Categorical |
|                  | v00narcot  | EV:Q50e.Used strong prescription pain medications (e.g., narcotics) for joint    | Categorical |
| <b>Alignment</b> |            |                                                                                  |             |
|                  | v00rkalnmt | EV: Right knee exam: alignment, degrees (valgus negative)                        | Continuous  |
|                  | v00rkdefcv | EV: Right knee exam: alignment varus or valgus                                   | Categorical |

627

628

629

630

631

632

633

634

635

636

637

638

639

640

641

642

643

644

645

646

647

648

649

650

651 **Supplementary Table 2:** The number of and percentage of missing data for each predictor in  
652 the model with 10 predictors (final proposed model).

653

654

655

656

| Variable                                         | Number Missing<br>(of the 1044 total<br>subjects) | Percent Missing<br>(%) |
|--------------------------------------------------|---------------------------------------------------|------------------------|
| Repeated chair stands: trial 1 time              | 35                                                | 3.35                   |
| Age                                              | 0                                                 | 0                      |
| Cartilage T <sub>2</sub> : medial femur          | 27                                                | 2.59                   |
| WORMS: meniscus max score                        | 0                                                 | 0                      |
| Isometric strength: knee extension, max<br>force | 184                                               | 17.62                  |
| Blood pressure: systolic                         | 0                                                 | 0                      |
| Cartilage T <sub>2</sub> : average               | 0                                                 | 0                      |
| WORMS: cartilage max score                       | 0                                                 | 0                      |
| WOMAC pain score                                 | 0                                                 | 0                      |
| Body Mass Index (BMI)                            | 0                                                 | 0                      |

657
